# Supplementary material for: Intraflagellar transport 27 is essential for hedgehog signaling but dispensable for ciliogenesis during hair follicle morphogenesis
Source: Oxford University Press journal article supplement (doi:10.1242/dev.115261), 2015-05-29
Supplement: dev115261supp.pdf [file dev115261supp.pdf]

## Fig S1

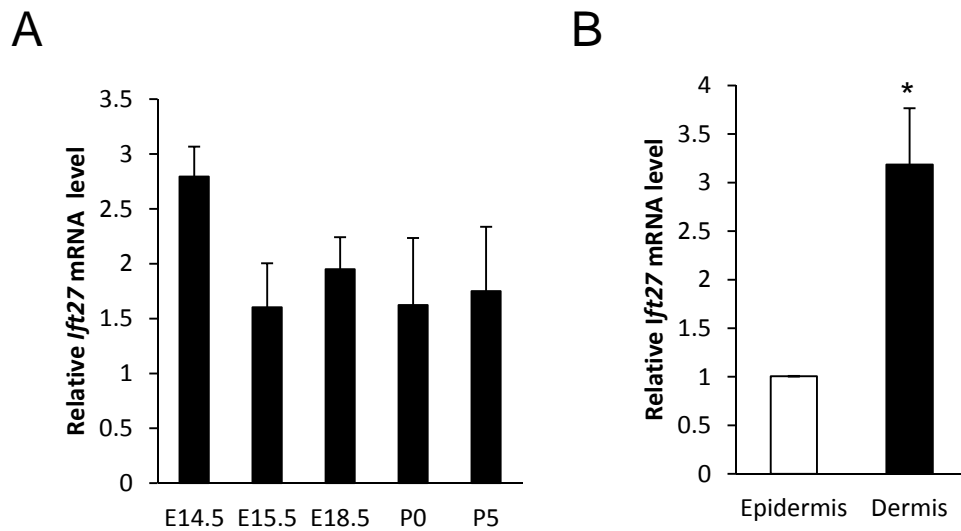

**Fig. S1. *Ifit27* mRNA expression in mouse skin.** (A) *Ifit27* mRNA level during skin development. n=4. (B) *Ifit27* mRNA levels in epidermis and dermis of E18.5 embryos. n=3. \*,  $P < 0.05$ .

## Fig S2

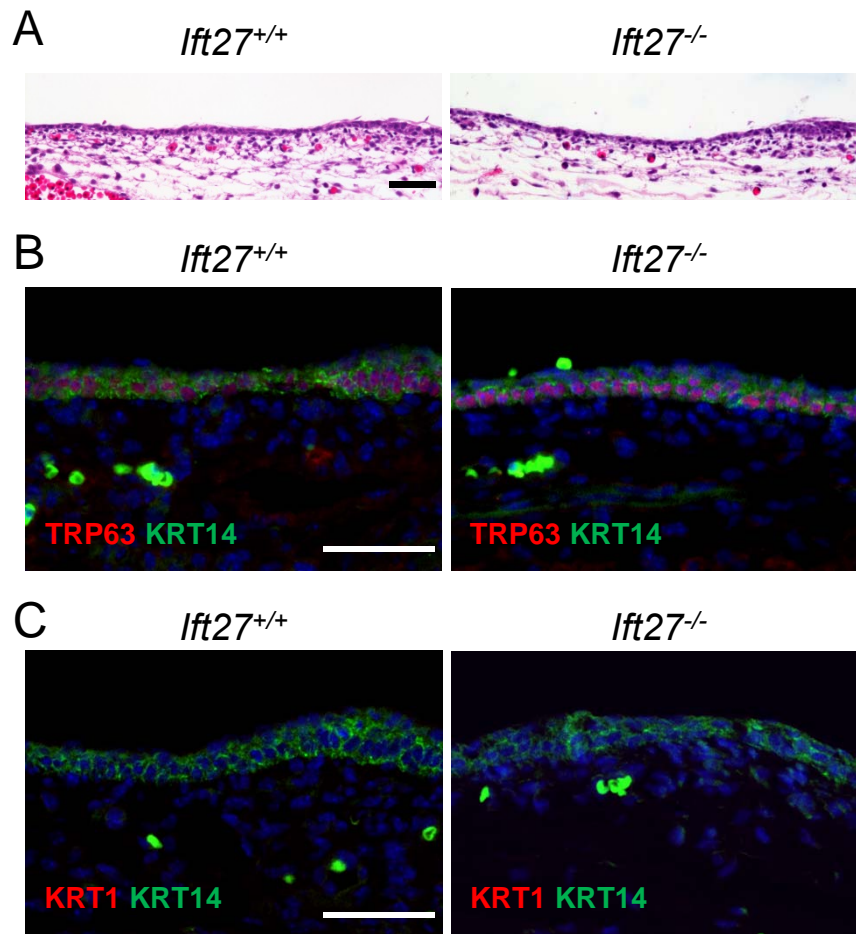

**Fig. S2.** Control (*Ift27*<sup>+/+</sup>) and *Ift27* mutant (*Ift27*<sup>-/-</sup>) skins at E14.5. (A) H&E staining. (B) TRP63 (red) and KRT14 (green). (C) KRT1 (red) and KRT14 (green). Note, KRT1 is absent. Scale bars: 50 μm.

Fig S3

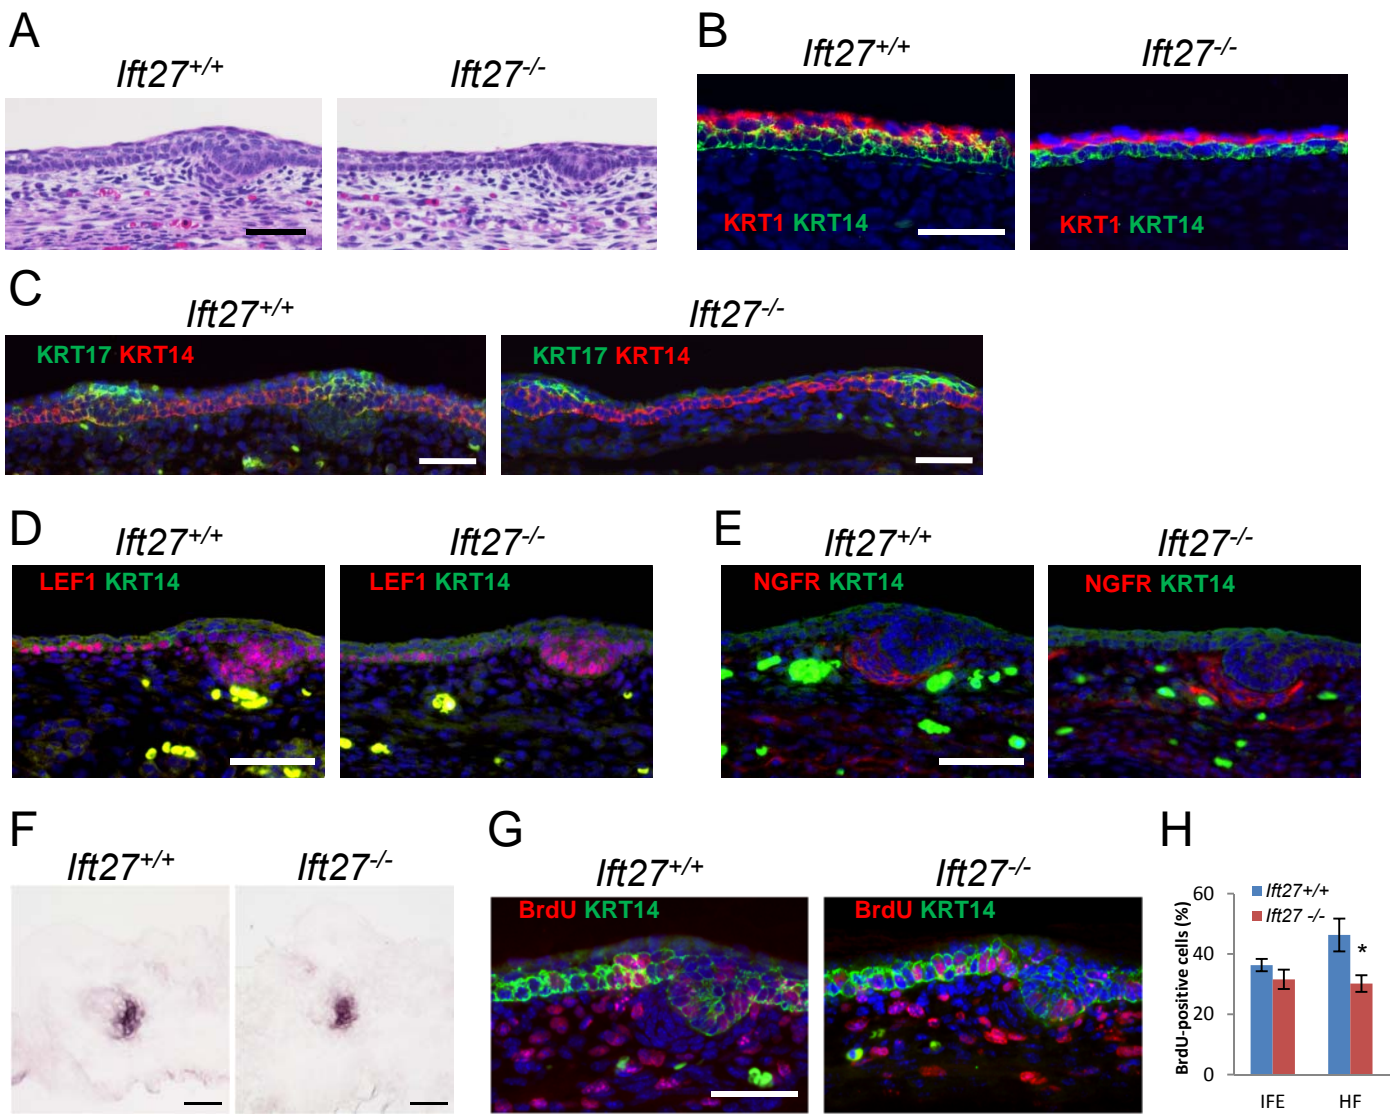

**Fig. S3. Control (*Ift27*<sup>+/+</sup>) and *Ift27* mutant (*Ift27*<sup>-/-</sup>) skins at E15.5. (A)** H&E staining. **(B)** KRT1 (red) and KRT14 (green). **(C)** KRT17 (green) and KRT14 (red). **(D)** LEF1 (red) and KRT14 (green). **(E)**, NGFR (p75<sup>NTR</sup>, red) and KRT14 (green). **(F)** Alkaline phosphatase (AP) staining in E16.5 skins. **(G)** BrdU (red) and KRT14 (green). **(H)** Quantification of BrdU-positive cells in interfollicular epidermis (IFE) and hair follicles (HF). \*, *P* < 0.05. Scale bars: 50  $\mu$ m.

Fig S4

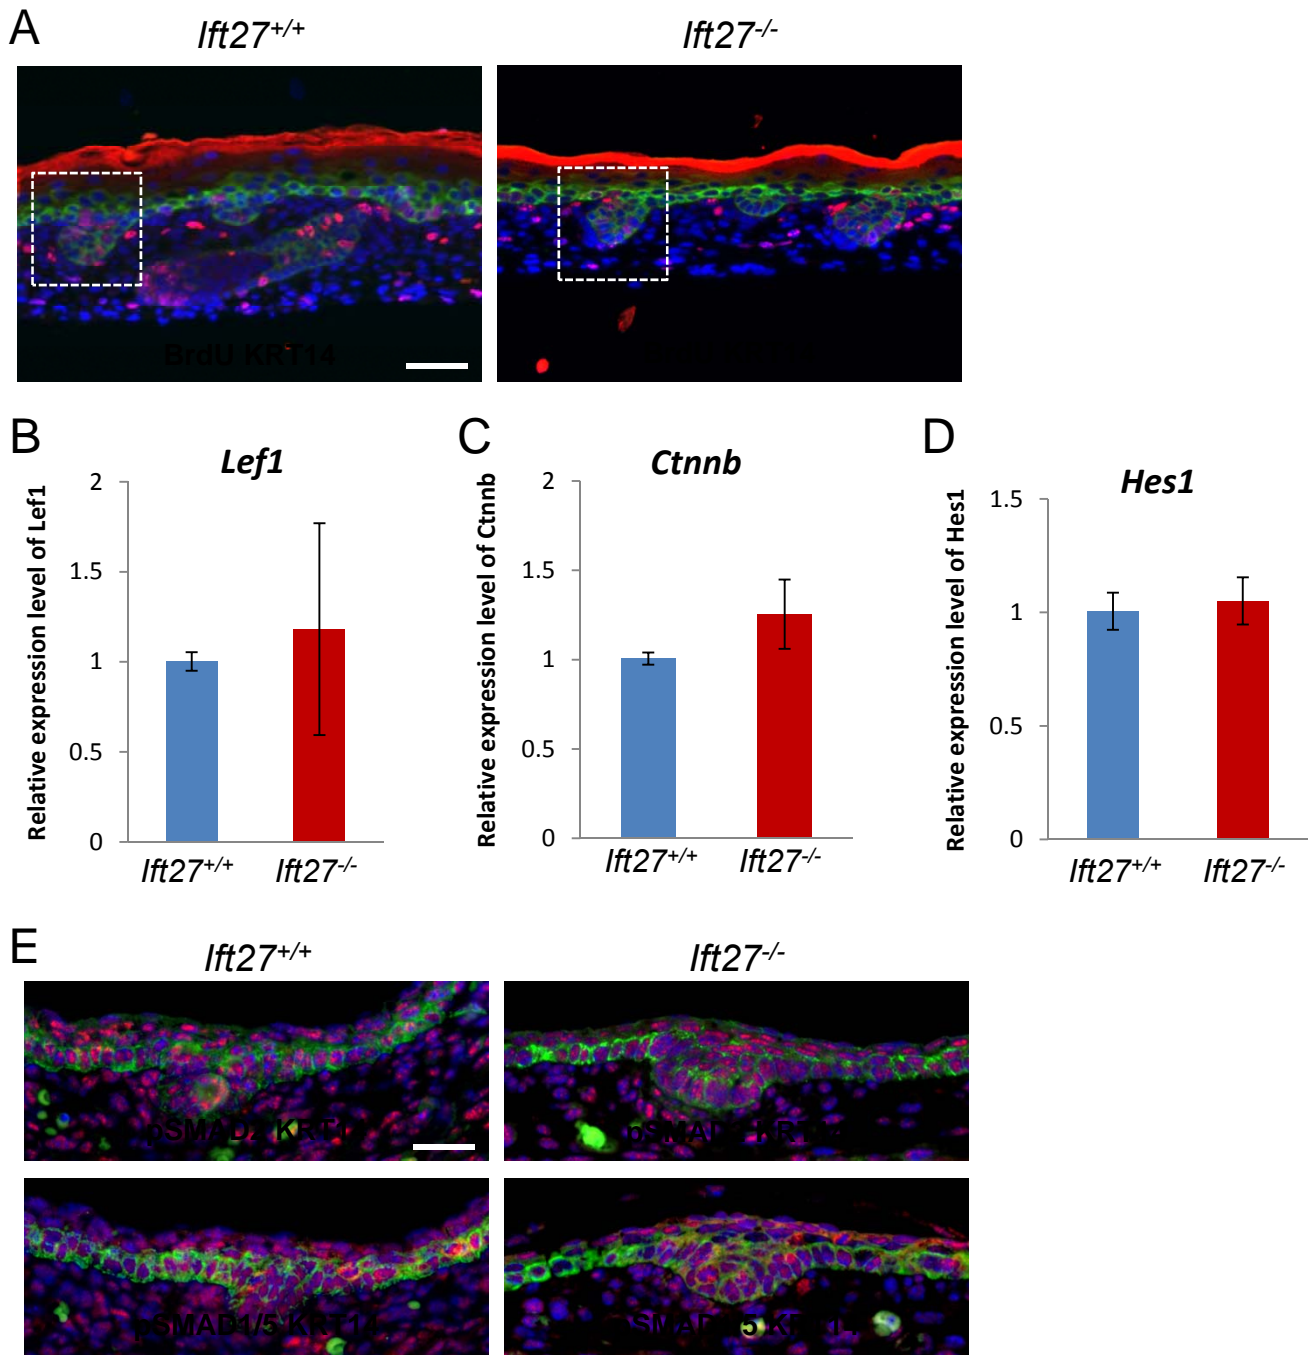

**Fig. S4. Control (*Ift27*<sup>+/+</sup>) and *Ift27* mutant (*Ift27*<sup>-/-</sup>) skins at E18.5. (A)** BrdU (red) and KRT14 (green). Note that BrdU-positive cells in stage 2 hair follicles (boxed) were quantified. **(B–D)** Relative expression levels of *Lef1*, *Ctnnb* and *Hes1* by quantitative RT-PCR. Note, the expression levels of these Wnt and Notch target genes are comparable in *Ift27*<sup>+/+</sup> and *Ift27*<sup>-/-</sup> skins. n=3. **(E)** Expression of phospho-SMAD2 (pSMAD2) and phospho-SMAD1/5 (pSMAD1/5) in control and mutant skin. Scale bar: 50 μm in A, 25 μm in E.

## Fig S5

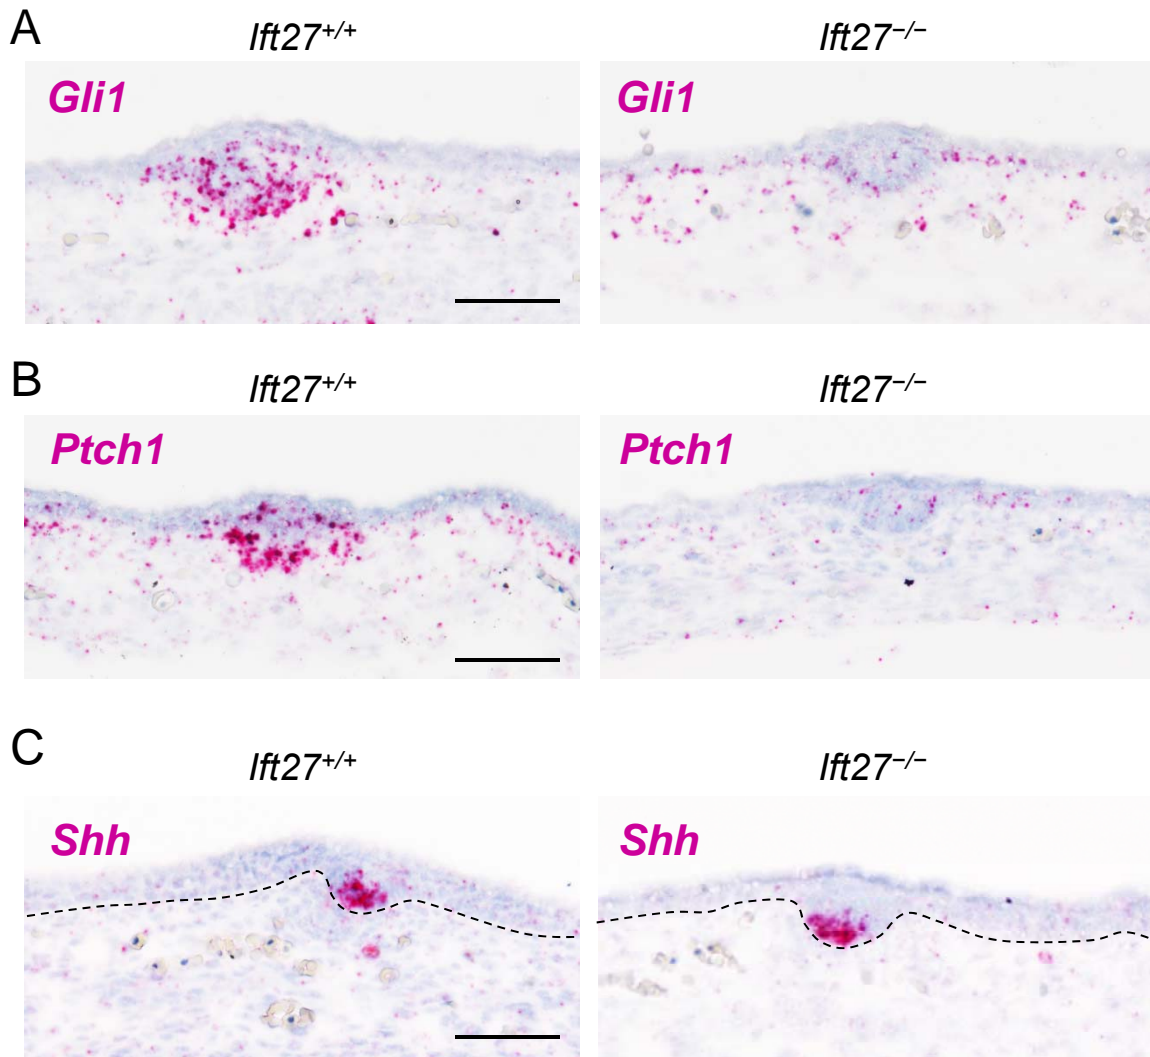

**Fig. S5. Hedgehog signaling in skin of E15.5 control (*Ift27*<sup>+/+</sup>) and *Ift27* mutant (*Ift27*<sup>-/-</sup>).** (A–C) *In situ* hybridization of *Gli1* (A), *Ptch1* (B), and *Shh* (C) in E15.5 skins of control and *Ift27* mutant, n=3. Dotted lines represent basement membrane. Note that the expression of *Shh* was comparable in hair follicles of control and *Ift27* mutant. Scale bars: 50  $\mu$ m.

## Fig S6

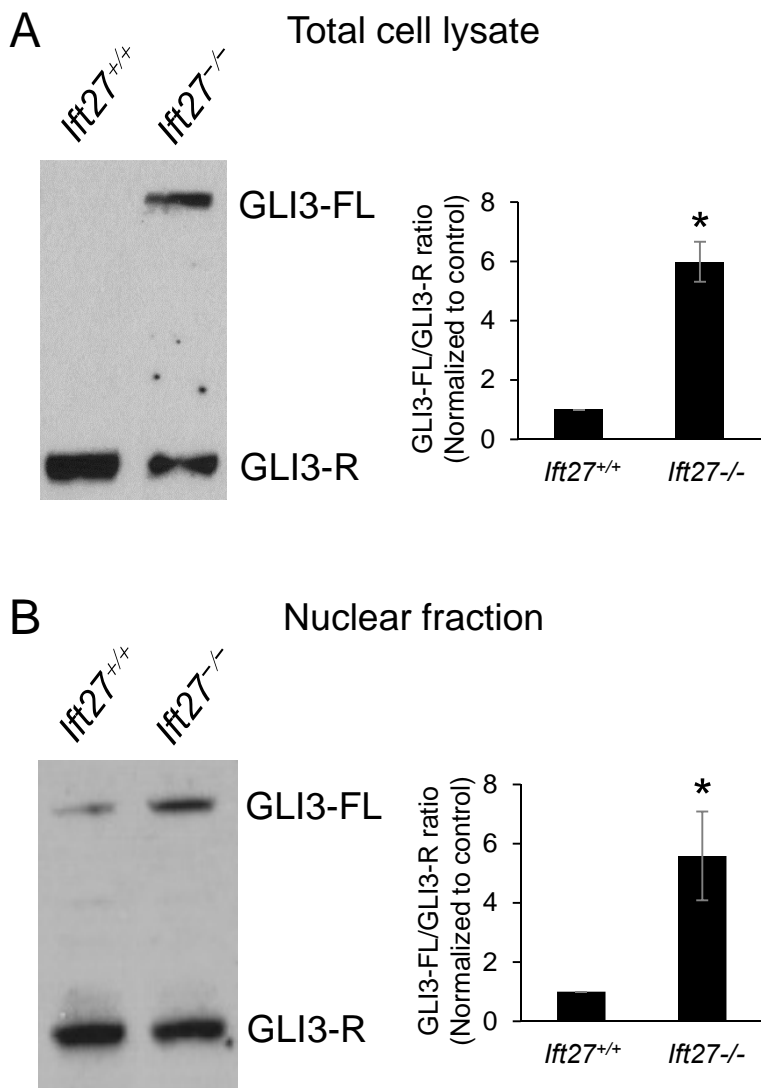

**Fig. S6. Expression of full-length GLI3 (GLI3-FL) and repressor form of GLI3 (GLI3-R) in primary dermal fibroblast isolated from control (*Ift27*<sup>+/+</sup>) and *Ift27* mutants (*Ift27*<sup>-/-</sup>).** (A) Representative western blotting and quantification of GLI3 in whole cell lysate. (B) Representative western blotting and quantification of GLI3 in the nuclear fraction of the cells. n=3. \*,  $P < 0.05$ .

Fig. S7

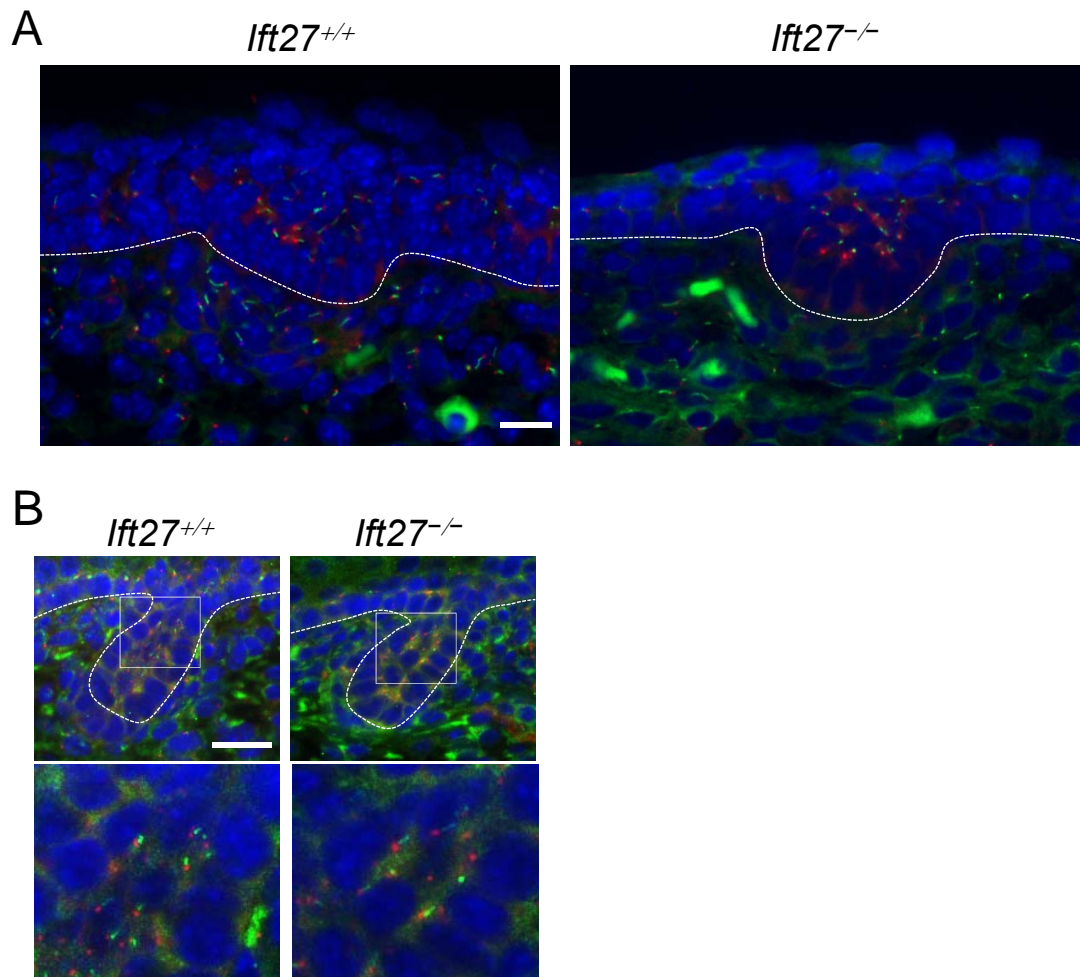

**Fig. S7. Primary cilia in control (*Ift27<sup>+/+</sup>*) and *Ift27* mutant (*Ift27<sup>-/-</sup>*).** (A) Cilia (ARL13B, green) and basal body ( $\gamma$ -tubulin, red) in hair follicles of E15.5 skins. (B) Cilia (ACIII, green) and basal body ( $\gamma$ -tubulin, red) in stage 2 hair follicles of E18.5 skins. Lower panels are enlarged boxed areas above. Scale bars: 25  $\mu$ m.

Fig. S8

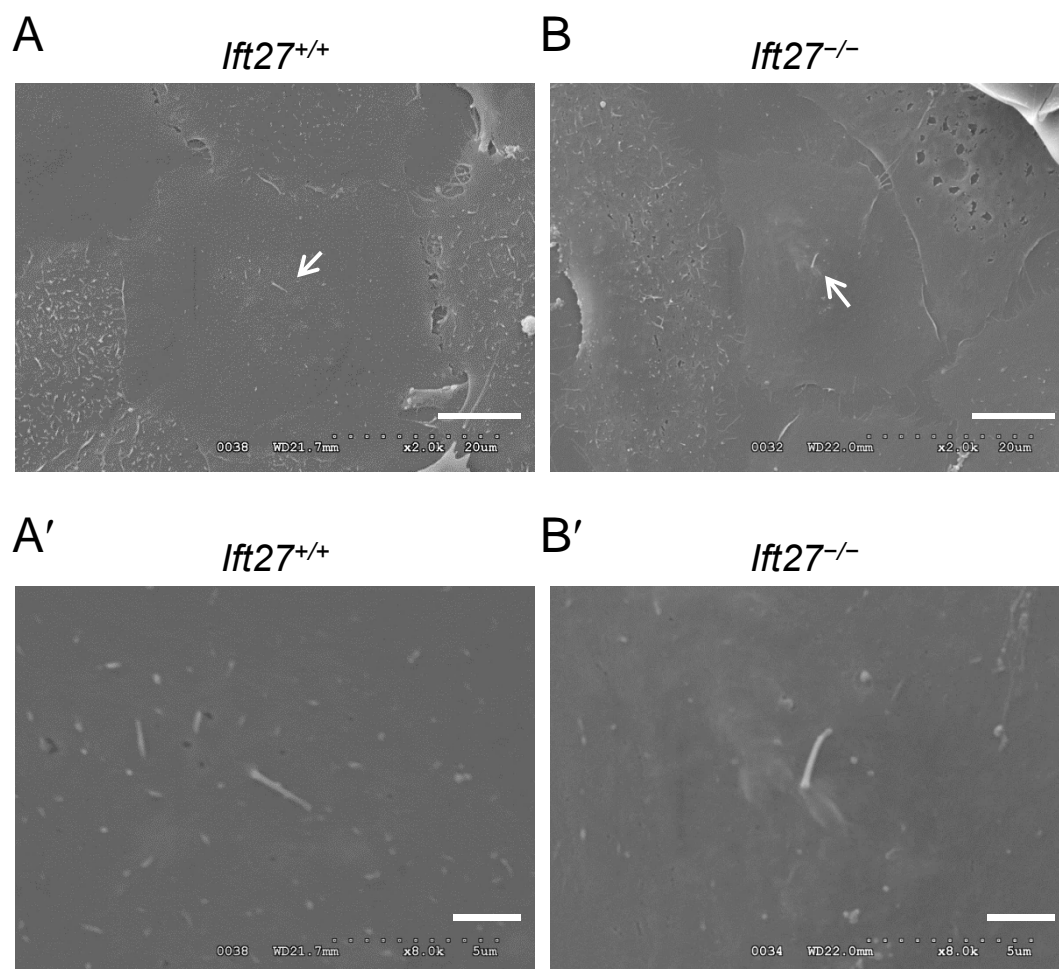

**Fig. S8. Primary cilia in control (*Ift27<sup>+/+</sup>*) and *Ift27* mutant (*Ift27<sup>-/-</sup>*) the primary keratinocytes by scanning electron microscopy. (A) Cilium in a control cell. (B) Cilium in a mutant cell. A' and B' are enlarged areas of cilia shown in A and B. Scale bar: 10 μm in A and B; 2 μm in A' and B'.**



## Fig S9

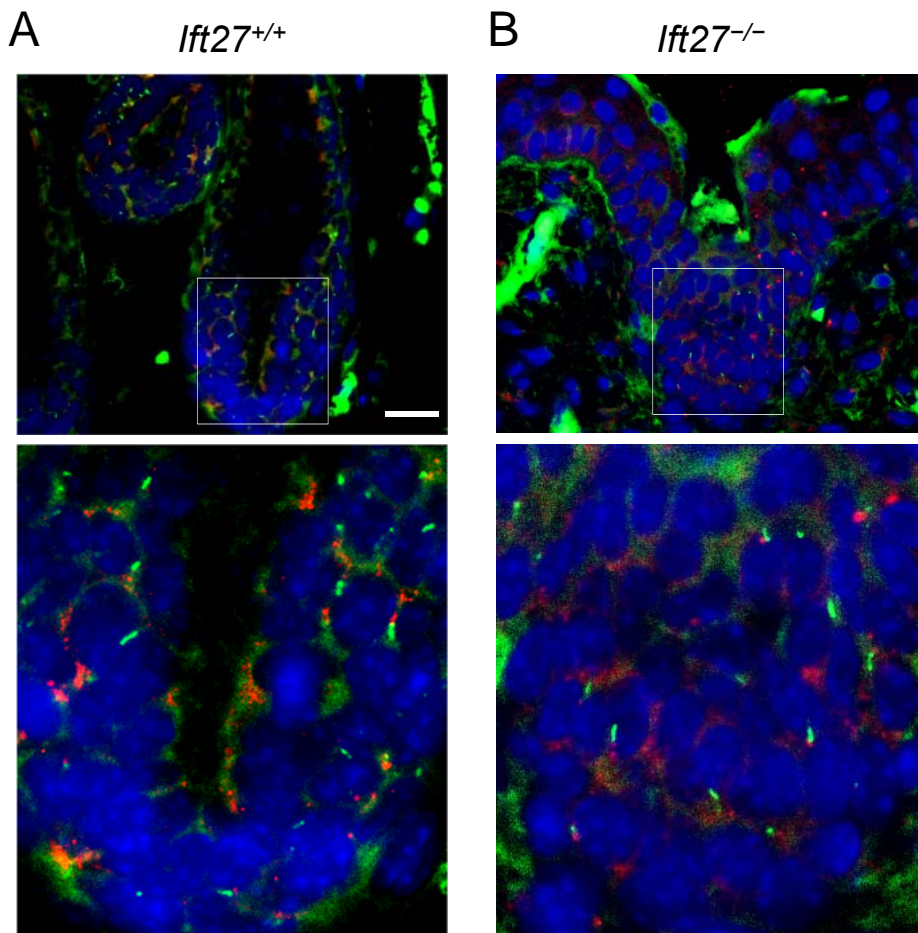

**Fig. S9. Primary cilia in control (*lft27*<sup>+/+</sup>) and *lft27* mutant (*lft27*<sup>-/-</sup>) skin transplants. (A)** Cilia (ARL13B, green) and basal body (γ-tubulin, red) in hair follicles of *lft27*<sup>+/+</sup> skin transplants. **(B)** Cilia (ARL13B, green) and basal body (γ-tubulin, red) in the hair follicle-like invagination of *lft27*<sup>-/-</sup> skin transplants. Lower panels are enlarged boxed areas above. Scale bar: 20 μm.
